# Supplementary material for: LYN-mediated phosphorylation promotes TJP1 deubiquitination via USP8 to drive neovascularization and tumorigenesis in bladder cancer
Source: Research Square preprint supplement (doi:10.21203/rs.3.rs-7928736/v1), 2025-11-14
Supplement: Supplementary file 1 [file b643a2f155416abeec9defe4.docx]

**Supplementary materials**

**Supplementary Figure 1. USP8 combines with TJP1 in BLCA.**


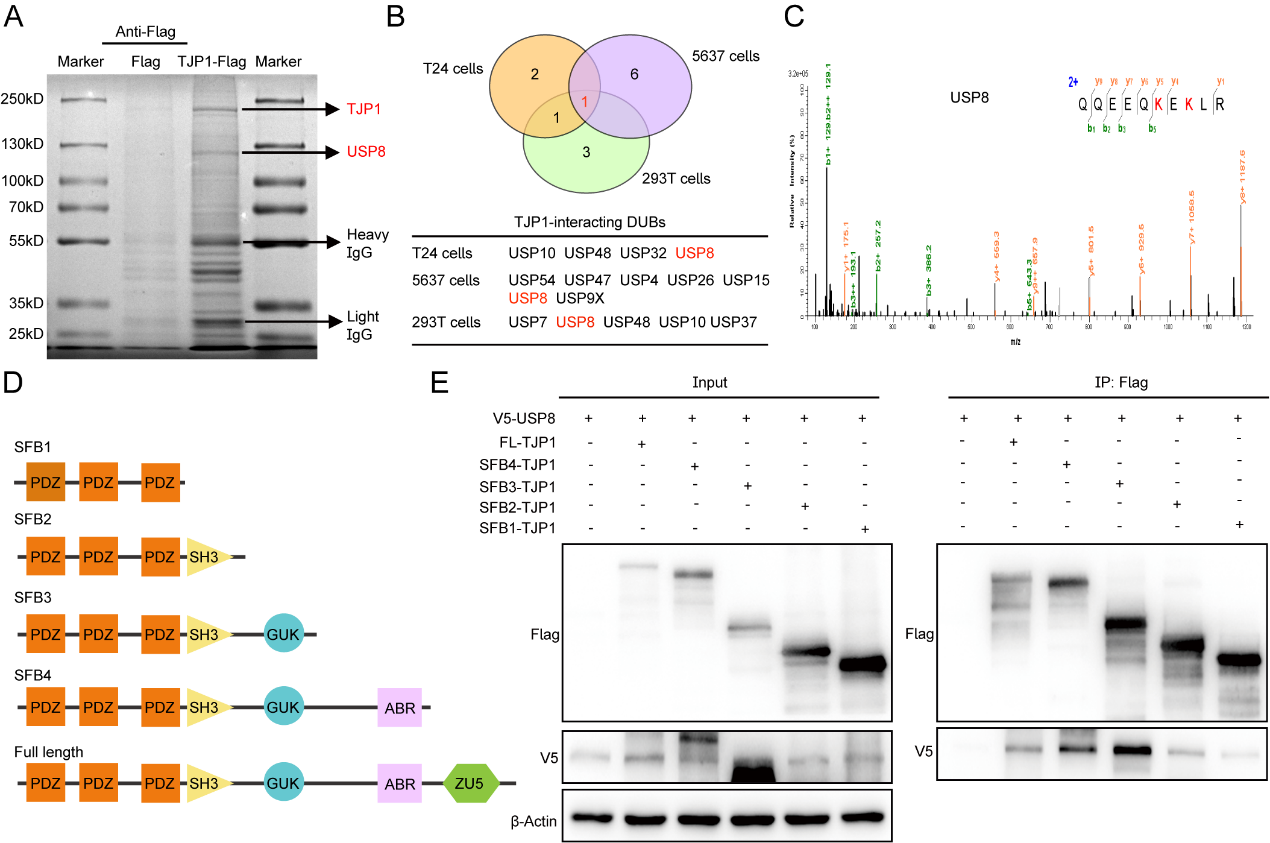


**(A)** Cellular extract from 293T cells stably expressing Flag (Vector) or Flag-TJP1 were immunopurified with anti-Flag antibody and then eluted. The eluates were resolved by SDS-PAGE and Coomassie blue-stained.

**(B)** Summary of the binding proteins verified by mass spectrometry conducted in 293T and T24 as well as 5637 cells to search for DUBs that interact with TJP1 when co-expressed.

**(C)** Mass spectrometry data of analyzed the peptide of USP8 pulled down by TJP1 was as indicated in panel.

**(D)** The schematic of full length and segmented TJP1 plasmids was showed for using in the following analysis.

**(E)** 293T cells were co-transfected V5-USP8 plasmids with full length or segmented TJP1 plasmids. Co-IP assay was performed by using Flag magnetic beads followed by immunoblotting with Flag or HA antibody.

**Supplementary Figure 2. USP8 promotes BLCA angiogenesis through TJP1.**


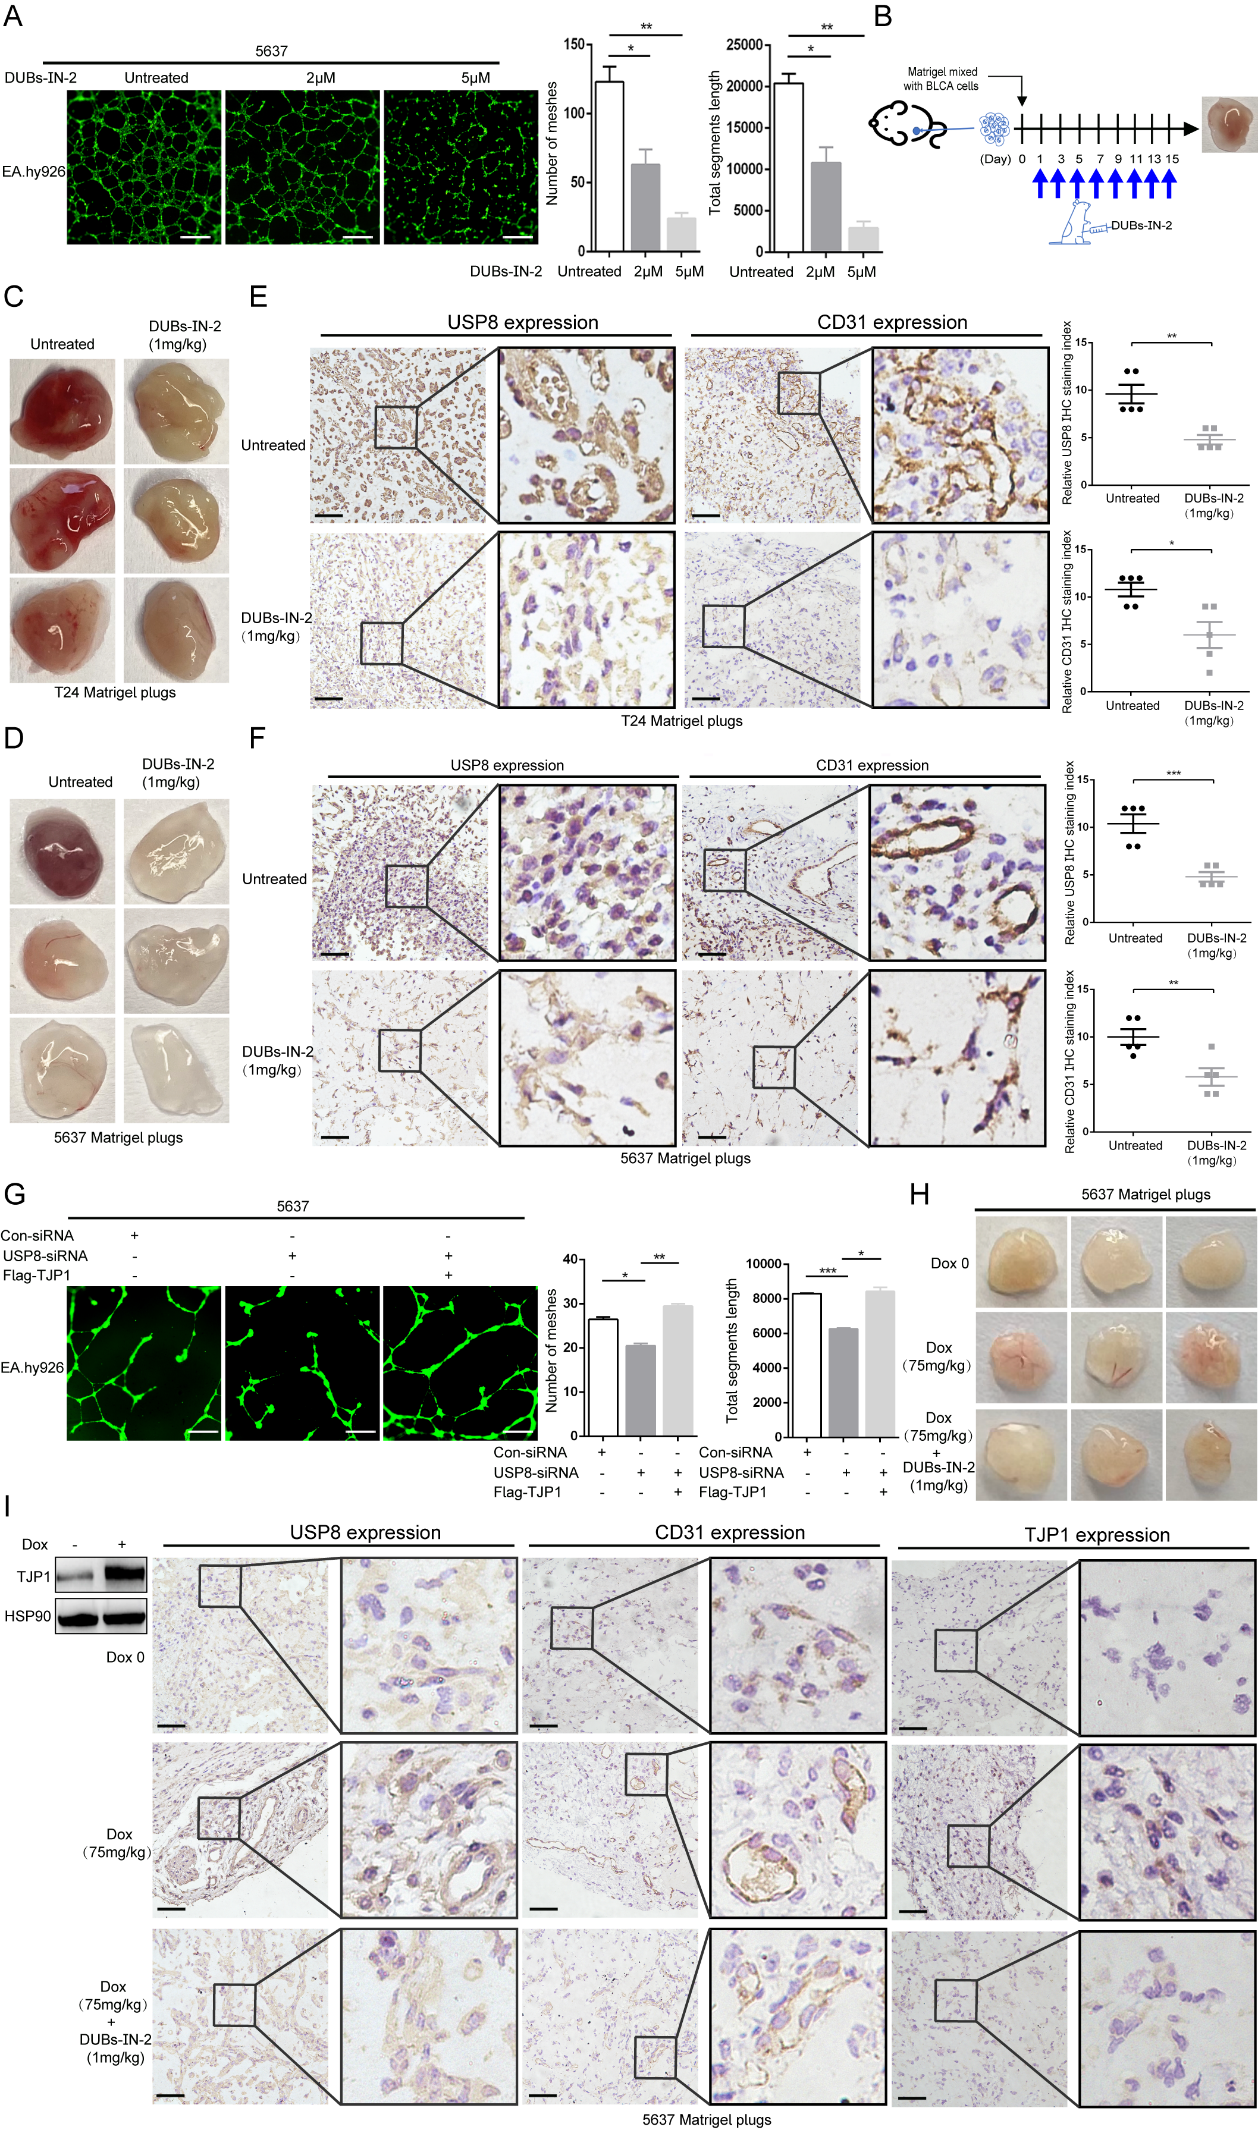


**(A)** EA.hy926 cells cultured with conditioned medium (CM) derived from 5637 cells when treating with USP8 inhibitor DUBs-IN-2. Tube formation was stained with Calcein AM (1 μM) for 30 minutes and imaged by fluorescence microscopy. Scale bar = 100 μm.Vascular-like network formation numbers were counted and analyzed by angiogenesis module of Image J. All quantitative data are reported as the mean ± standard error of the mean (SEM) from at least three independent experiments. *,0.01< p < 0.05; **, 0.001< p < 0.01; ***, p < 0.001.

**(B)** Schematic diagram of Matrigel plug for *in vivo* evaluation of angiogenesis in BLCA. USP8 inhibitor DUBs-IN-2 was injected intraperitoneally into the mice every two days. The plugs were harvested after 10 days (T24 cells) and 15 days (5637 cells), respectively.

**(C-D)** The T24 and 5637 cells xenograft mice were sacrificed in time, the Matrigel plugs were taken out and photograph.

**(E-F)** IHC staining for USP8 and CD31 in paraffin embedded T24 and 5637 cells Matrigel plugs, insets show magnification for staining detail, the scale bar, 250 μm. The relative IHC staining index of USP8 and CD31 in Matrigel plugs from xenograft mice injected with indicated T24 and 5637 cells.

**(G)** EA.hy926 cells cultured with conditioned medium (CM) derived from USP8-silenced 5637 cells followed by overexpression of TJP1. Tube formation was stained with Calcein AM (1 μM) for 30 minutes and imaged by fluorescence microscopy. Scale bar = 100 μm.The number of meshes and segment lengths were analyzed by ImageJ software. All quantitative data are reported as the mean ± standard error of the mean (SEM) from at least three independent experiments. *,0.01< p < 0.05; **, 0.001< p < 0.01; ***, p < 0.001.

**(H)** Matrigel plugs were removed from xenograft mice injected with 5637 cells that stable overexpressed TJP1, followed by processed for macroscopic images.

**(I)** IHC staining for USP8, CD31 as well as TJP1 in paraffin embedded 5637 cells Matrigel plugs, insets show magnification for staining detail, the scale bar, 250 μm.

**Supplementary Figure 3.** **USP8 deubiquitinates TJP1 at Lys695 site to participate in BLCA angiogenesis.**


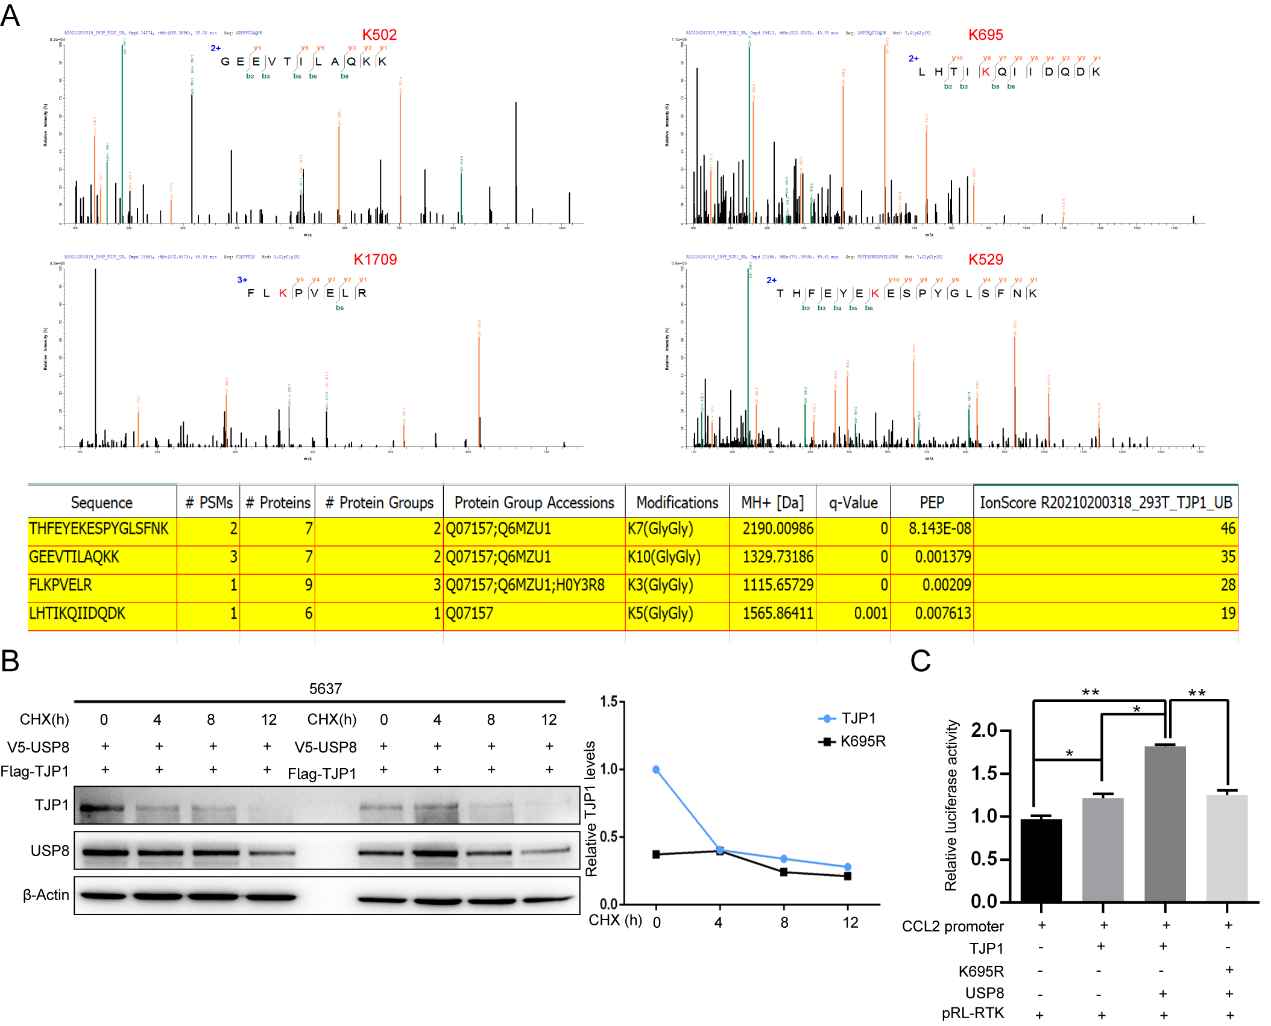


**(A)** Mass spectrometry data of enzymatic digested peptides from Flag-TJP1 was acquired and analyzed using MaxQuant. The 4 ubiquitination sites of TJP1 on K502, K529, K695, K1709 were highlighted and shown on the peptide sequence.

**(B)** 5637 cells were co-transfected with USP8 plasmid and TJP1 or TJP1-K695R plasmid, then they were treated with CHX (20 μg/mL) for 4,8 and 12 hours, and the TJP1 expression was detected by western blot.

**(C)** 293T cells were co-transfected with indicated plasmids, the relative activity of the CCL2 promoter was evaluated by dual luciferase reporter assay. All quantitative data are reported as the mean ± standard error of the mean (SEM) from at least three independent experiments. *,0.01< p < 0.05; **, 0.001< p < 0.01; ***, p < 0.001.

**Supplementary Figure 4. Screening of TJP1-specific E3 ligases in bladder cancer.**


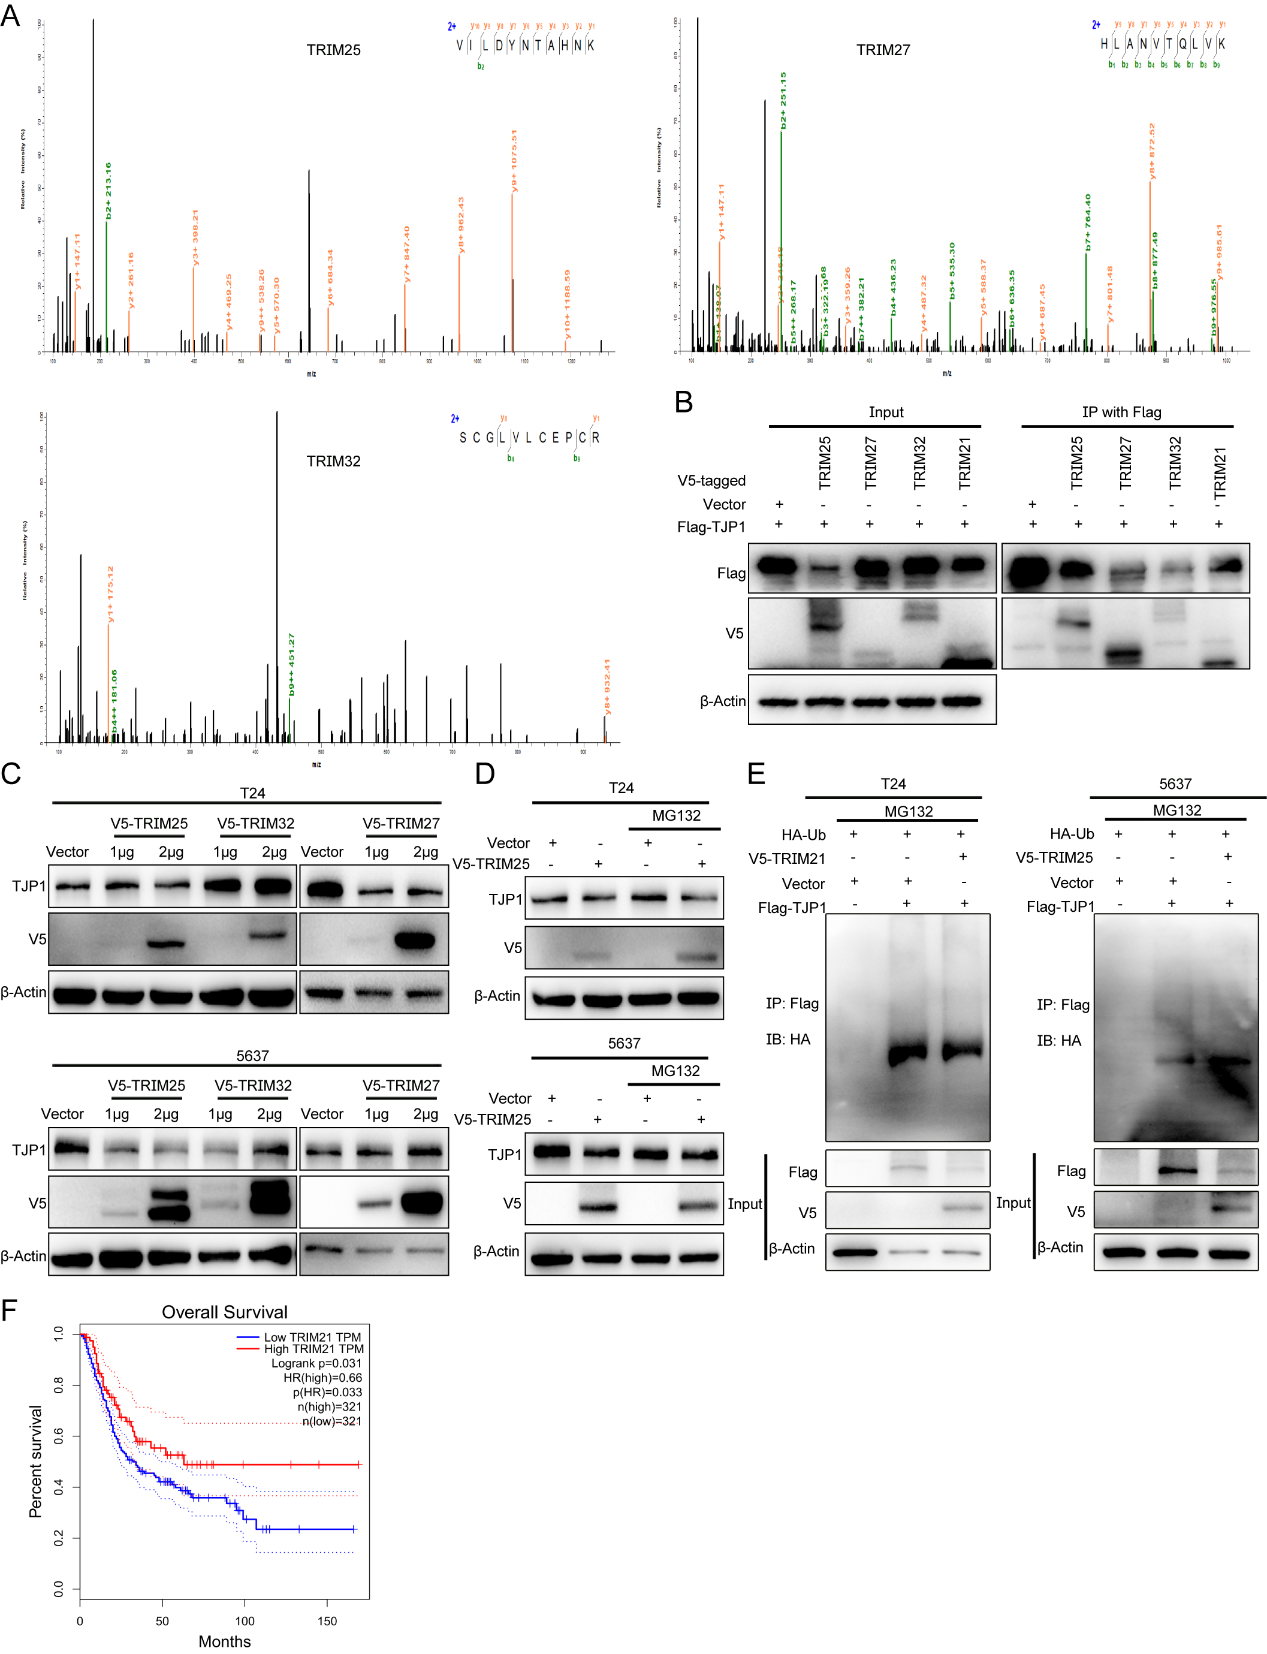


**(A)** Mass spectrometry data of analyzed the peptide of E3 ligases of TRIM family pulled down by TJP1 was as indicated in panel.

**(B)** 293T cells were co-transfected with Flag-TJP1 and indicated V5-tagged E3 ligase plasmids, cells were lysed and analyzed by IP assay using Flag magnetic beads followed by immunoblotting with Flag or V5 antibody.

**(C)** TJP1 protein expression was detected after transfecting the indicated E3 ligases of TRIM family in T24 and 5637 cells.

**(D)** T24 and 5637 cells were transfected with V5-tagged TRIM25 plasmid and treated with MG132 (20 μM). V5 and TJP1 expression was assessed by western blot.

**(E)** T24 and 5637 cells were co-transfected with HA-Ub, V5-TRIM25 and Flag-TJP1 plasmids. Cells were lysed, and immunoprecipitated using anti-Flag magnetic beads, and then subjected to immunoblotting with the HA antibody to detect TJP1 ubiquitination.

**(F)** Kaplan–Meier plots of survival in 642 bladder cancer patients, stratified by protein expression of TRIM21. Log rank analysis was conducted to determine significance.

**Supplementary Figure 5. LYN mediated phosphorylation of TJP1 increases its stability and nuclear localization in BLCA.**


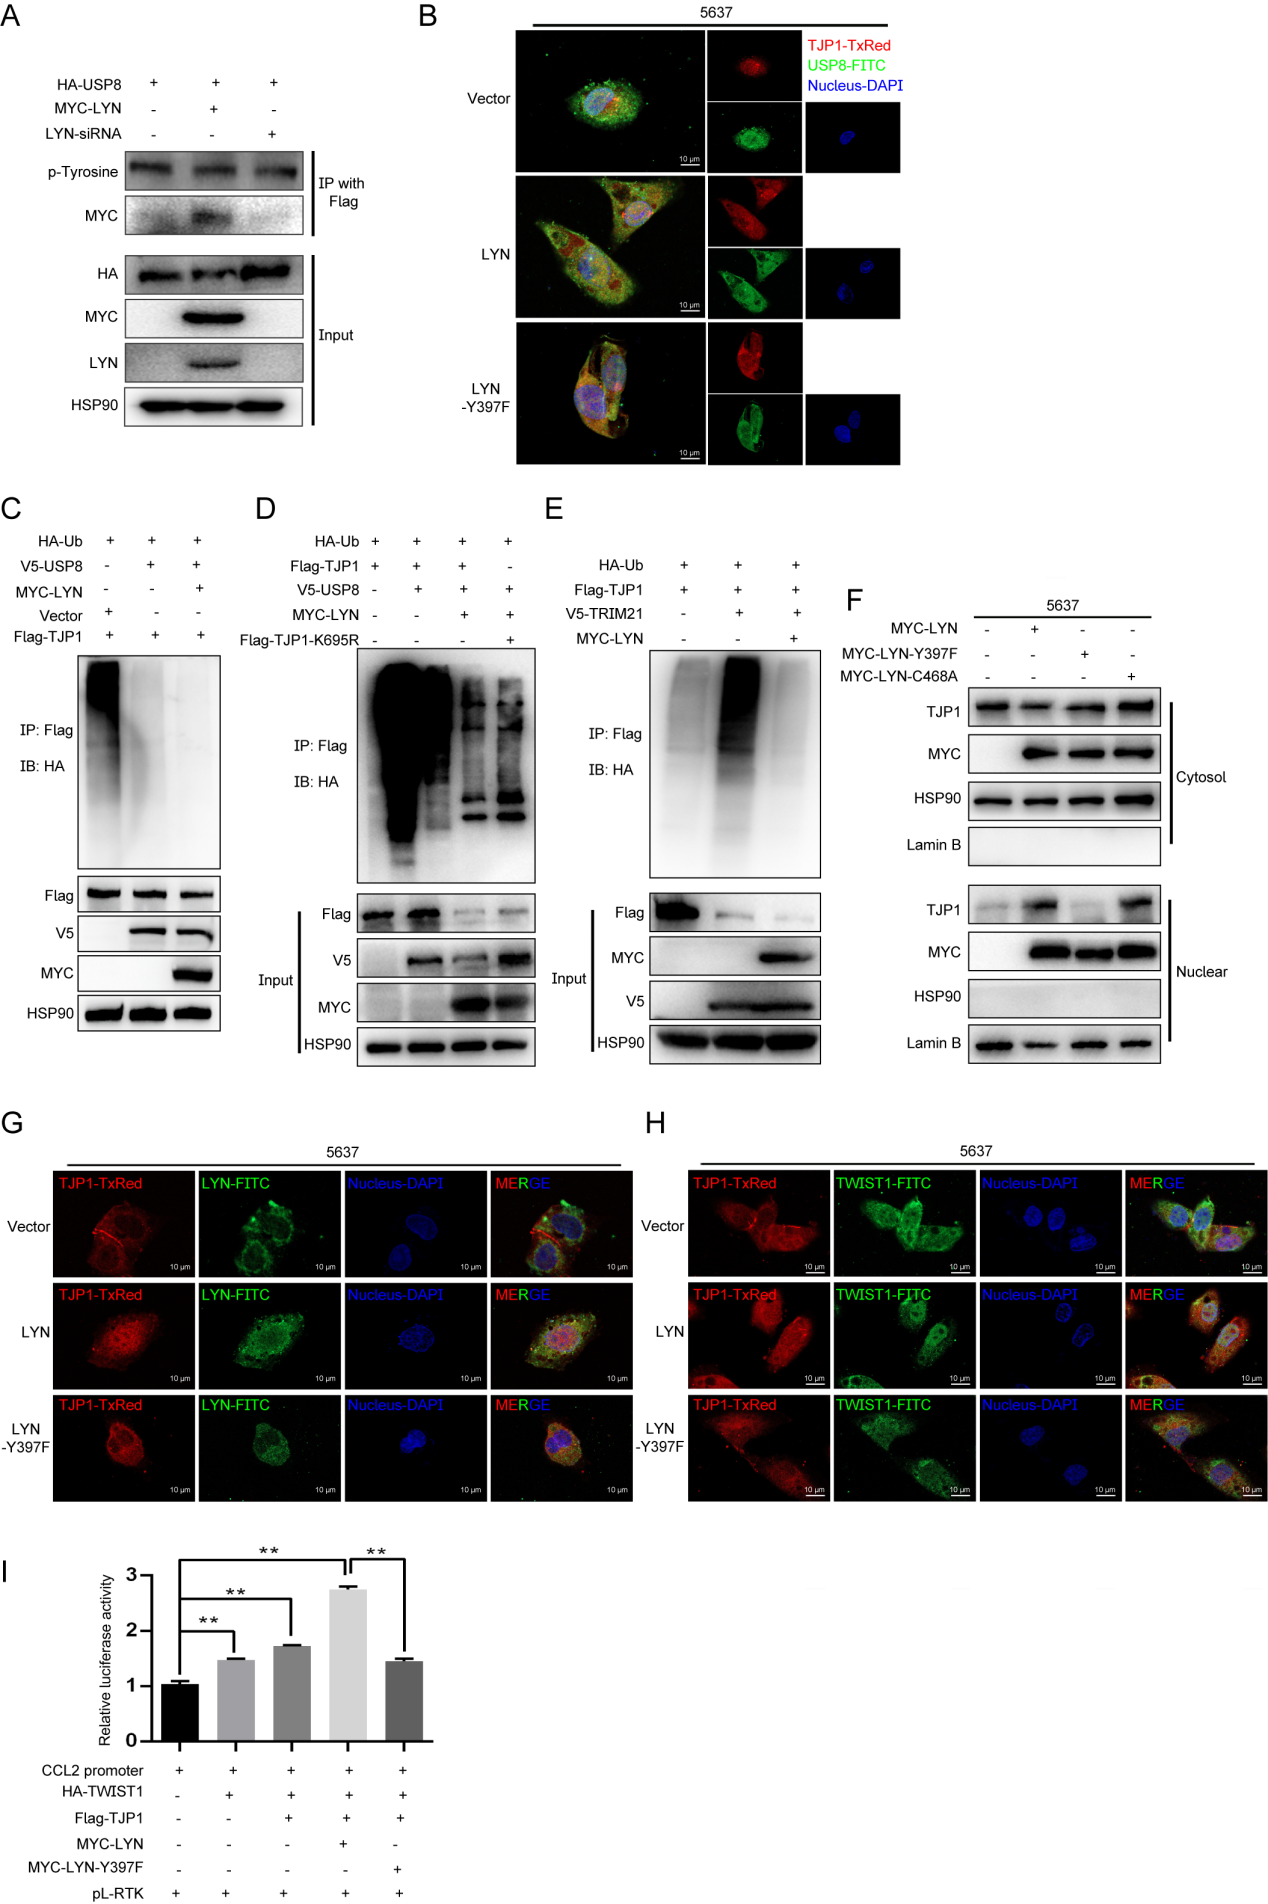


**(A)** 293T cells were transfected with the indicated plasmids or siRNA, cells were lysed, and immunoprecipitated using anti-Flag magnetic beads, and then subjected to immunoblotting with the p-Tyrosine antibody to detect USP8 phosphorylation.

**(B)** IF assay was performed to detect TJP1 (red fluorescence) and USP8 (green fluorescence) in 5637 cells that transfecting the indicated LYN mutant plasmids. Photos were imaged by confocal microscope. Scale bar = 10 μm.

**(C)** 293T cells were transfected with the HA-Ub, V5-USP8, Flag-TJP1 and MYC-LYN plasmids, cells were lysed, and immunoprecipitated using anti-Flag magnetic beads, and then subjected to immunoblotting with the HA antibody to detect TJP1 ubiquitination.

**(D)** 293T cells were transfected with the HA-Ub, V5-USP8, MYC-LYN, Flag-TJP1 and TJP1 K695R plasmids, cells were lysed, and immunoprecipitated using anti-Flag magnetic beads, and then subjected to immunoblotting with the HA antibody to detect TJP1 ubiquitination.

**(E)** 293T cells were transfected with the HA-Ub, V5-TRIM21, MYC-LYN, Flag-TJP1 plasmids, cells were lysed, and immunoprecipitated using anti-Flag magnetic beads, and then subjected to immunoblotting with the HA antibody to detect TJP1 ubiquitination.

**(F)** 5637 cells were transfected with LYN or the indicated LYN mutant plasmids, nuclear and cytosolic lysates were immunoblotted with the indicated antibodies.

**(G)** IF assay was performed to detect TJP1 (red fluorescence) and LYN (green fluorescence) in 5637 cells that treatment with LYN inhibitor Saracatinib or transfecting the indicated LYN mutant plasmids. Photos were imaged by confocal microscope. Scale bar = 10 μm.

**(H)** IF assay was performed to detect TJP1 (red fluorescence) and TWIST1 (green fluorescence) in T24 cells that treatment with LYN inhibitor Saracatinib or transfecting the indicated LYN mutant plasmids. Photos were imaged by confocal microscope. Scale bar = 10 μm.

**(I)** 293T cells were co-transfected with the indicated plasmids for 24 hours, the relative activity of the CCL2 promoter was evaluated by dual luciferase reporter assay. All quantitative data are reported as the mean ± standard error of the mean (SEM) from at least three independent experiments. *,0.01< p < 0.05; **, 0.001< p < 0.01; ***, p < 0.001.

**Supplementary Figure 6. LYN promotes the phosphorylation of TJP1 and further increases tumor angiogenesis in bladder cancer.**

**
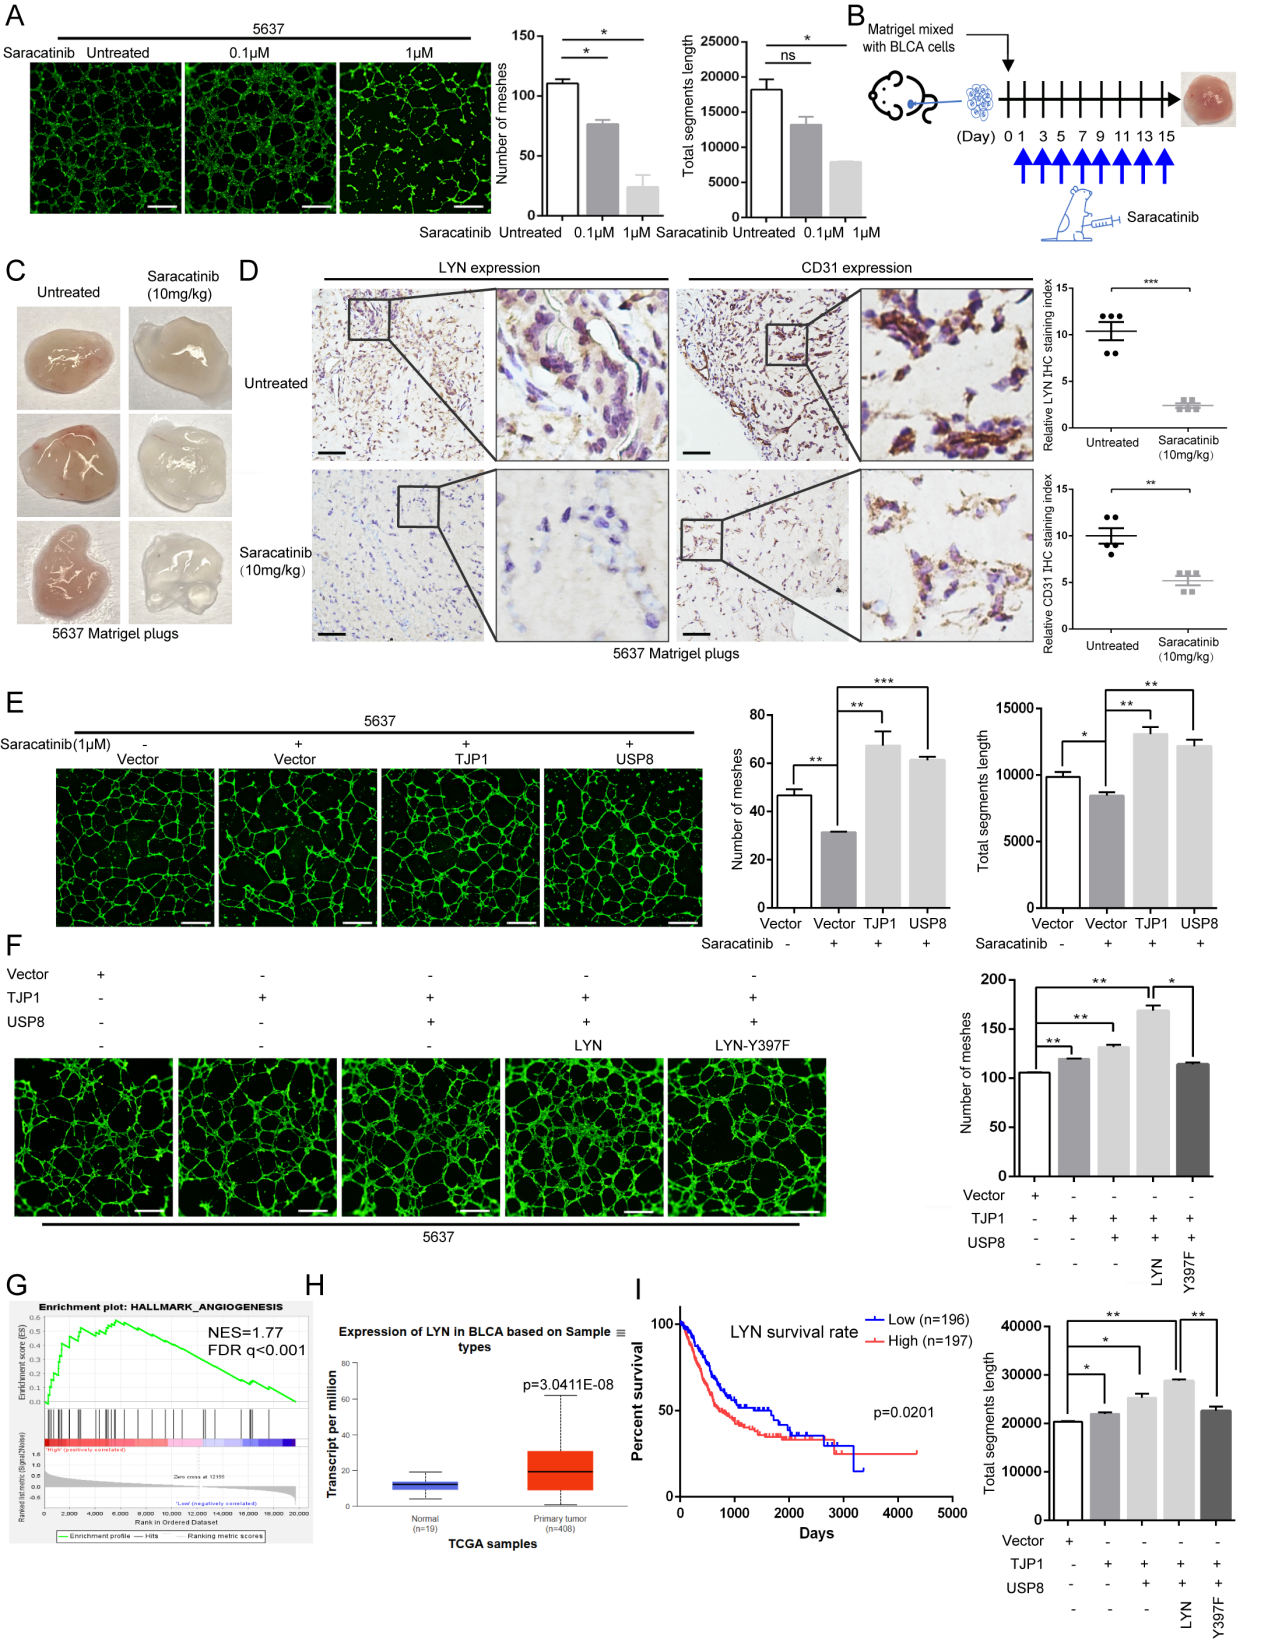
**

**(A)** EA.hy926 cells cultured with conditioned medium (CM) derived from 5637 cells when treating with LYN inhibitor Saracatinib. Tube formation was stained with Calcein AM (1 μM) for 30 minutes and imaged by fluorescence microscopy. Scale bar = 100 μm. The number of meshes and segment lengths were analyzed using ImageJ software. All quantitative data are reported as the mean ± standard error of the mean (SEM) from at least three independent experiments. *,0.01< p < 0.05; **, 0.001< p < 0.01; ***, p < 0.001.

**(B)** Schematic diagram of Matrigel plug for *in vivo* evaluation of angiogenesis in BLCA. LYN inhibitor Saracatinib was injected intraperitoneally into the mice every two days. The plugs were harvested after 10 days (T24 cells) and 15 days (5637 cells), respectively.

**(C)** The 5637 cells xenograft mice were sacrificed in time, the Matrigel plugs were taken out and photograph.

**(D)** IHC staining for LYN and CD31 in paraffin embedded 5637 cells Matrigel plugs, insets show magnification for staining detail. The scale bar, 250 μm. The relative IHC staining index of LYN and CD31 in Matrigel plugs from xenograft mice injected with indicated 5637 cells.

**(E)** EA.hy926 cells cultured with conditioned medium (CM) derived from 5637 cells when treating with LYN inhibitor Saracatinib, followed by overexpressed TJP1 or USP8. Cells were colored by Calcein AM (1 μM) for 30 min and imaged by fluorescence microscope. Scale bar = 100 μm. The network formation numbers were counted and statistic analyzed by angiogenesis module of Image J. All quantitative data are reported as the mean ± standard error of the mean (SEM) from at least three independent experiments. *,0.01< p < 0.05; **, 0.001< p < 0.01; ***, p < 0.001.

**(F)** EA.hy926 cells cultured with conditioned medium (CM) derived from 5637 cells that transfected with indicated plasmids. Cells were colored by Calcein AM (1 μM) for 30 min and imaged by fluorescence microscope. Scale bar = 100 μm. Vascular-like network formation numbers were counted and analyzed by angiogenesis module of Image J. All quantitative data are reported as the mean ± standard error of the mean (SEM) from at least three independent experiments. *,0.01< p < 0.05; **, 0.001< p < 0.01; ***, p < 0.001.

**(G)** GSEA analysis for angiogenic-related gene signatures in the clinical BLCA patient database with LYN expression (FDR q< 0.001, NES=1.77).

**(H)** The expression of LYN in BLCA patients based on sample types from TCGA database (http://ualcan.path.uab.edu/analysis.html).

**(I)** Kaplan–Meier plots of survival in 393 BLCA patients stratified by LYN expression. Log rank analysis was conducted to determine significance.

**Supplementary Figure 7. LYN-USP8-TJP1 complex may serve as the potential targets for BLCA.**


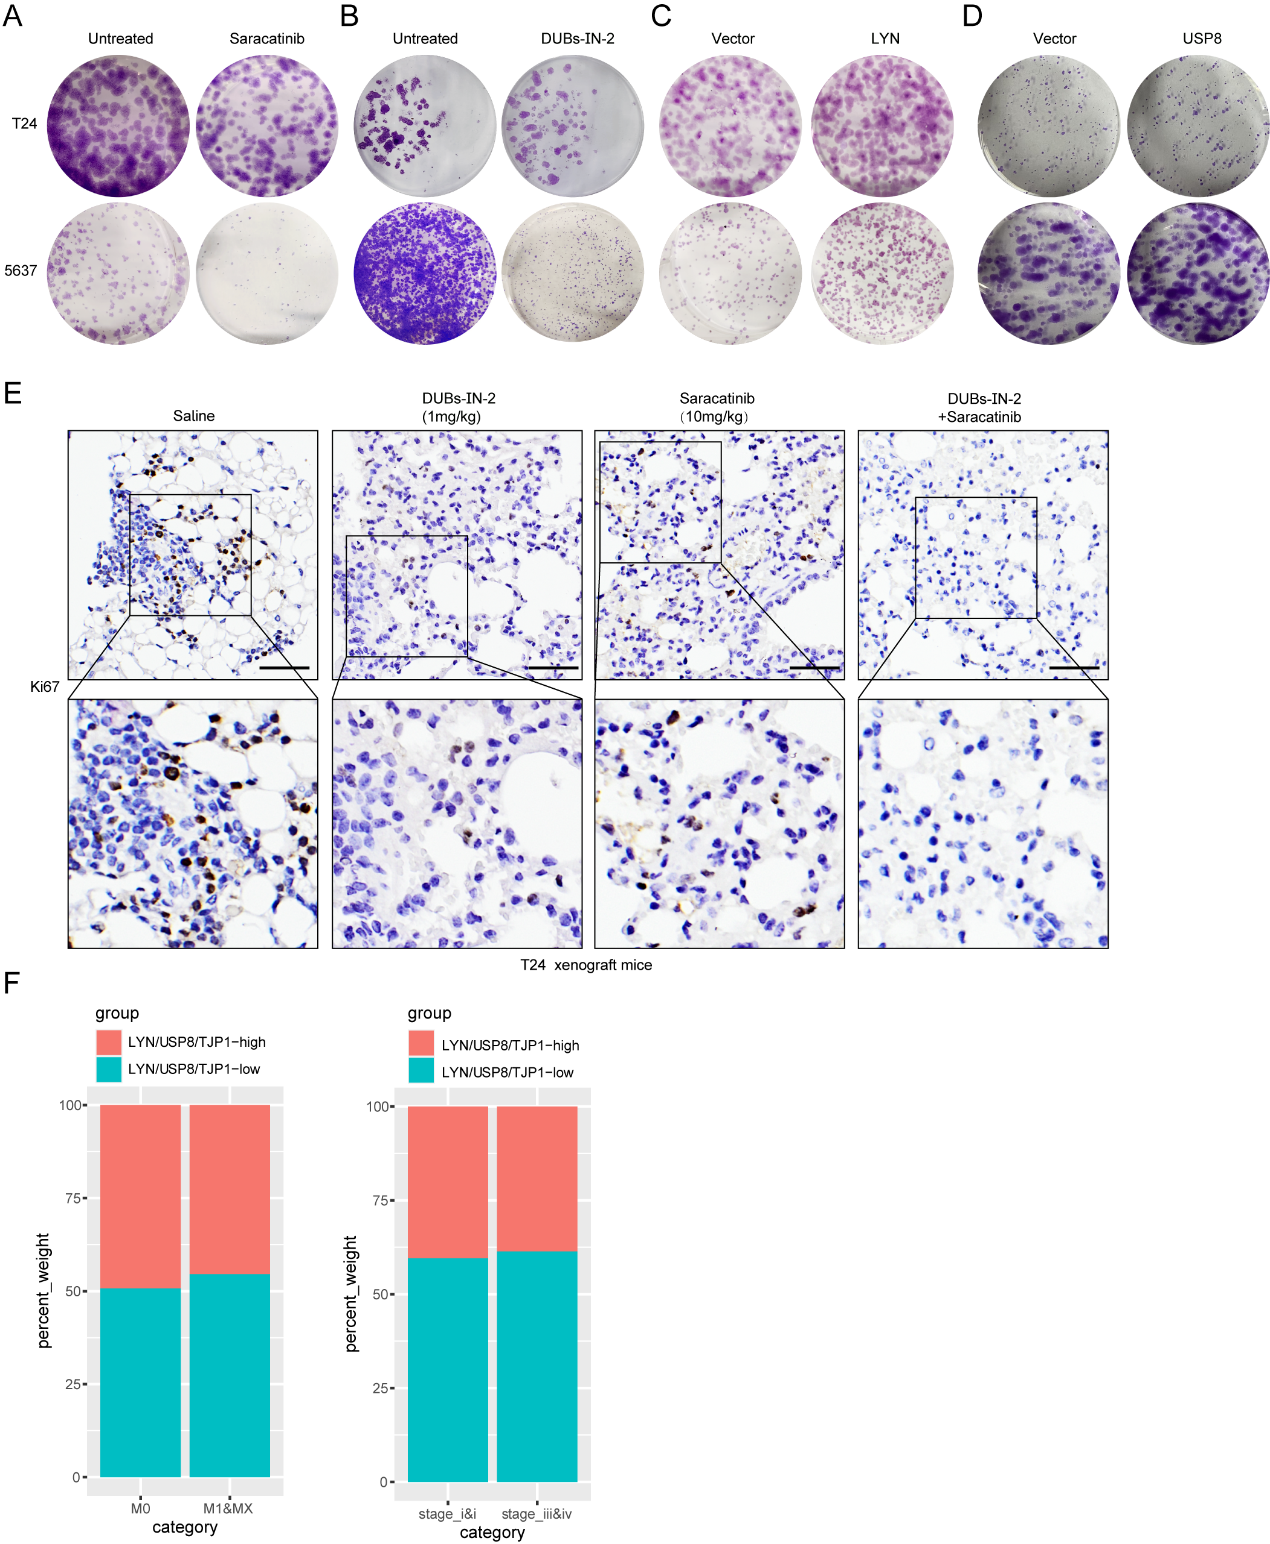


**(A-B)** Colony formation assay was performed to detect the proliferation of T24 and 5637 cells treatment with LYN and USP8 inhibitor. Cells were harvested after 10 days and stained by crystal violet.

**(C-D)** Colony formation assay was performed to detect the proliferation of T24 and 5637 cells after overexpressed LYN and USP8. Cells were harvested after 10 days and stained by crystal violet.

**(E)** Representative images of Ki67 IHC staining by T24 cells injected into the tail veins of SCID mice. Scale bar = 200 μm.

**(F)** R software was used to download the BLCA expression matrix and clinical data from TCGA. The distribution analysis of clinicopathological parameters in patients with BLCA in samples of three factors all high expression group and three factors all low expression group.

**Supplementary Table 1. The list of E3 ubiquitin ligases precipitated in TJP1 protein-binding mass spectrometry.**

| **Accession** | **Gene name** |
| --- | --- |
| NOSIP | Nitric Oxide Synthase Interacting Protein |
| TRIM27 | Tripartite Motif Containing 27 |
| TRIM25 | Tripartite Motif Containing 25 |
| TRIM32 | Tripartite Motif Containing 32 |
| ZNF598 | Zinc Finger Protein 598 |
| ITCH | itchy E3 ubiquitin protein ligase |
| UHRF1 | ubiquitin like with PHD and ring finger domains 1 |
| TOPORS | TOP1 binding arginine/serine rich protein |
| HECTD1 | HECT domain E3 ubiquitin protein ligase 1 |
| MYCBP2 | MYC binding protein 2 |

**Supplementary Table 2. The list of kinases precipitated in TJP1 protein-binding mass spectrometry.**

| **Accession** | **Gene name** |
| --- | --- |
| LYN | LYN proto-oncogene |
| YES1 | YES proto-oncogene 1 |
| PKM | pyruvate kinase M1/2 |
| SRC | SRC proto-oncogene |
| ALPK1 | alpha kinase 1 |
| CDC42BPA | CDC42 binding protein kinase alpha |
| TTBK2 | tau tubulin kinase 2 |
| PRKCA | protein kinase C alpha |
| ULK1 | unc-51 like autophagy activating kinase 1 |
| ULK4 | unc-51 like kinase 4 |
| BMP2K | BMP2 inducible kinase |
| RPS6KA6 | ribosomal protein S6 kinase A6 |
| PIKFYVE | phosphoinositide kinase, FYVE-type zinc finger containing |
| OXSR1 | oxidative stress responsive kinase 1 |
| DYRK2 | dual specificity tyrosine phosphorylation regulated kinase 2 |
| WNK2 | WNK lysine deficient protein kinase 2 |
| CDK11A | cyclin dependent kinase 11A |
| DGKG | diacylglycerol kinase gamma |
| HIPK1 | homeodomain interacting protein kinase 1 |

**Supplementary Table 3. Prediction of potential LYN kinase phosphorylation sites for TJP1 by GSP5.0.**

| **Sequence** | **Position** | **Protein Group**  **Accessions** | **Kinase name** | **Modifications** | **IonScore** |
| --- | --- | --- | --- | --- | --- |
| SDNEEDSYDEEIHDP | 132 | Q07157(TJP1) | LYN | Phosphorylation | 3.78 |
| LPEPKPVYAQVGQPD | 389 | Q07157(TJP1) | LYN | Phosphorylation | 3.44 |
| AQKKKDVYRRIVESD | 507 | Q07157(TJP1) | LYN | Phosphorylation | 3.86 |
| AREEPDIYQIAKSEP | 669 | Q07157(TJP1) | LYN | Phosphorylation | 3.73 |
| DSRHTSDYEDTDTEG | 843 | Q07157(TJP1) | LYN | Phosphorylation | 2.86 |
| TDTEGGAYTDQELDE | 853 | Q07157(TJP1) | LYN | Phosphorylation | 2.83 |
| SEHDKTLYRIPEPQK | 1324 | Q07157(TJP1) | LYN | Phosphorylation | 3.05 |
| DPEEDEEYYRKQLSY | 1354 | Q07157(TJP1) | LYN | Phosphorylation | 2.73 |
| RSFGEKRYEPIQATP | 1419 | Q07157(TJP1) | LYN | Phosphorylation | 3.13 |
